# Supplementary material for: Three-dimensional porous reduced graphene oxide modified electrode for highly sensitive detection of trace rifampicin in milk
Source: Royal Society of Chemistry journal article supplement (doi:10.1039/d2ay00517d), 2022-01-01
Supplement: d2ay00517d1.pdf [file d2ay00517d1.pdf]

## Electronic supplementary information

### Three-dimensional porous reduced graphene oxide modified electrode for highly sensitive detecting trace rifampicin in milk

Keying Zhang<sup>a, b, c</sup>, Yan Wang<sup>a</sup>, Hongyan Wang<sup>a\*</sup>, Fajun Li<sup>a</sup>, Yu Zhang<sup>a</sup>, Na Zhang<sup>a\*</sup>

<sup>a</sup> *Anhui Key Laboratory of Spin Electron and Nanomaterials of Anhui Higher Education Institutes; School of Chemistry and Chemical Engineering, Suzhou University, Suzhou, Anhui 234000, China*

<sup>b</sup> *Key Laboratory for Agricultural Products Processing of Anhui Province, School of Food & Biological Engineering, Hefei University of Technology, Hefei 230009, China*

<sup>c</sup> *State Key Laboratory of Transducer Technology, Shanghai Institute of Microsystem and Information Technology, Chinese Academy of Sciences, Shanghai, 200050, China*

\*Corresponding Authors:

E-mail: zhangky1983@163.com (Z. Zhang)

suzhouwhy@163.com (H. Wang)

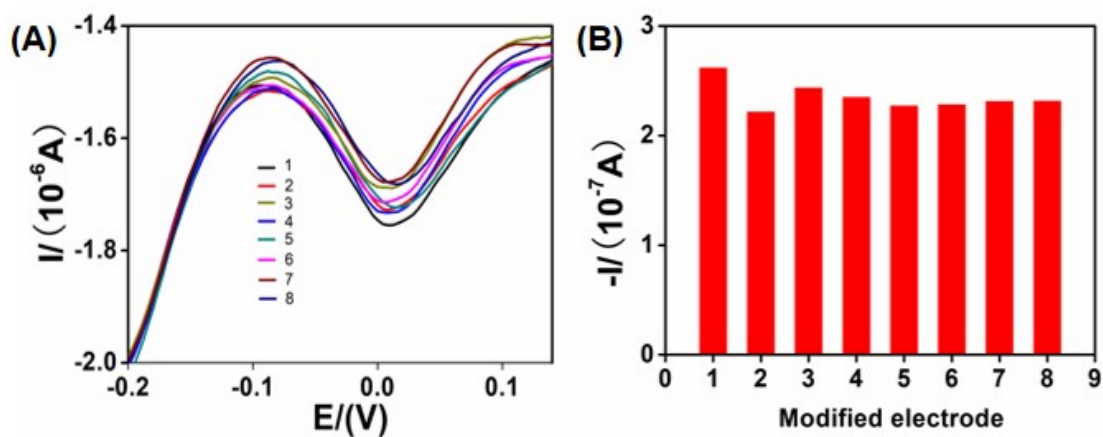

**Fig. S1.** (A) DPVs of  $4.0 \times 10^{-10}$  mol/L RIF at the different 3D pRGO/GCE independently prepared in 0.1 mol/L PBS (pH = 6.0); (B) The oxidation peak current of the concentration of RIF vs. different electrode.

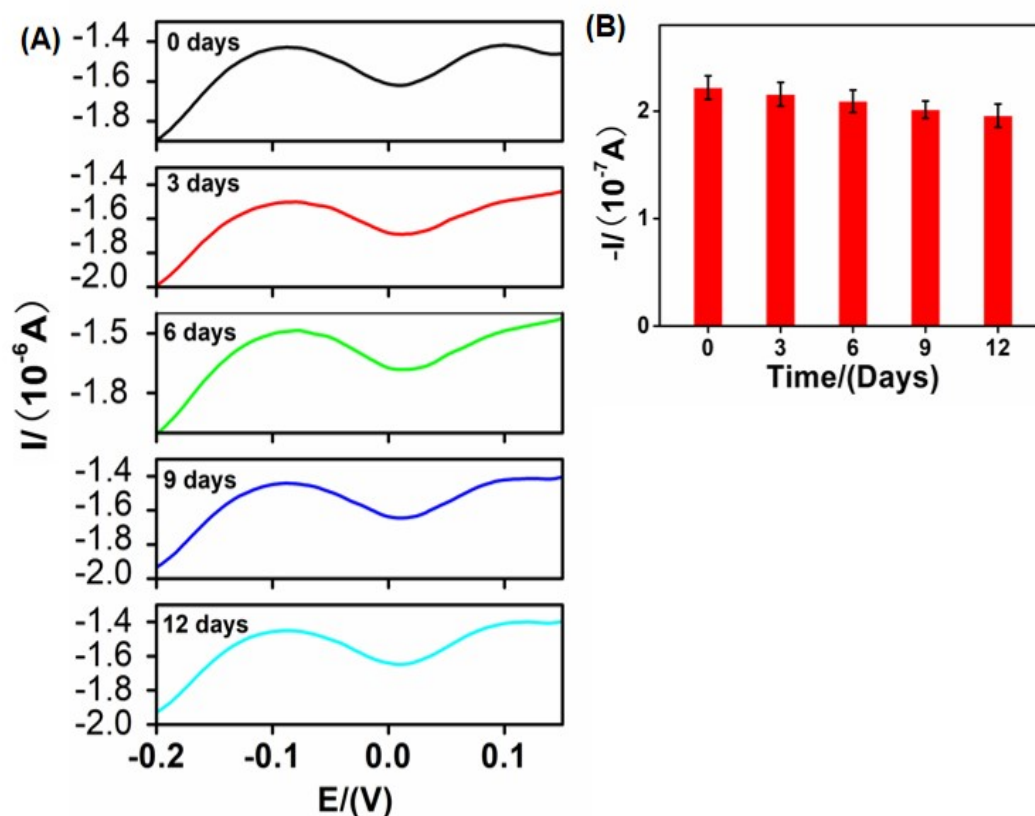

**Fig. S2.** (A) DPVs of  $4.0 \times 10^{-10}$  mol/L RIF at the 3D pRGO/GCE kept for different times in 0.1 mol/L PBS (pH = 6.0); (B) The oxidation peak current of the concentration of RIF vs. time.

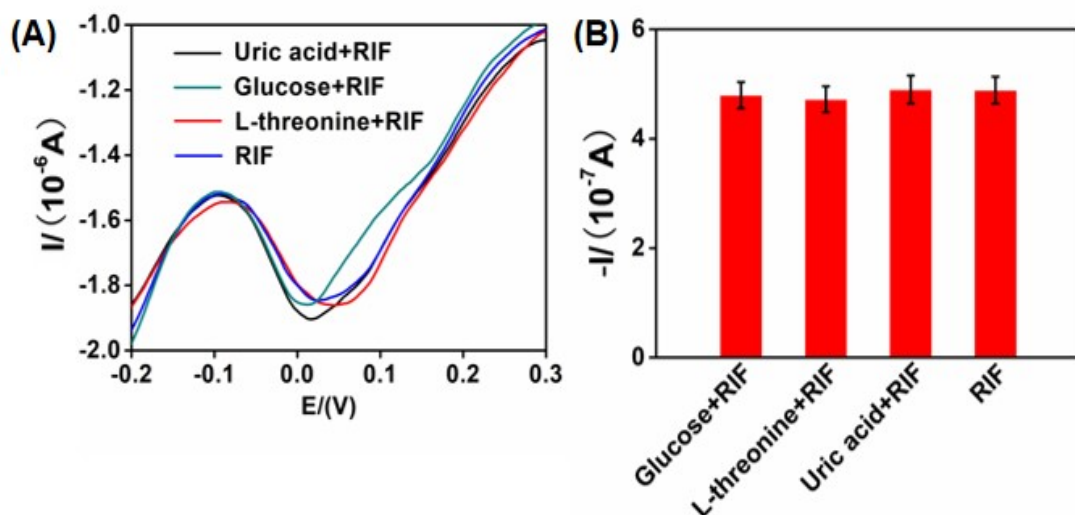

**Fig. S3.** (A) DPVs of  $8.0 \times 10^{-10}$  mol/L RIF at the 3D pRGO/GCE with different potential interferents in 0.1 mol/L PBS (pH = 6.0); (B) The oxidation peak current of the concentration of RIF vs. potential interferents.
